# Supplementary material for: Graphene-hollow-cubes with network-faces assembled a 3D micro-structured transparent and free-standing film for high performance supercapacitors
Source: Royal Society of Chemistry journal article supplement (doi:10.1039/c7ta03935b), 2017-01-01
Supplement: c7ta03935b1.pdf [file c7ta03935b1.pdf]

**Graphene-Hollow-Cubes with Network-Faces Assembled 3D Micro-Structured  
Transparent and Free-Standing Film for high performance Supercapacitor**

Na Li<sup>\*,†</sup>, Xuankai Huang<sup>†</sup>, Haiyan Zhang<sup>†</sup>, Zhicong Shi<sup>†</sup>, Chengxin Wang<sup>\*,‡</sup>

<sup>†</sup> *School of Material and Energy, Guangdong University of Technology, Guangzhou, 510006, P. R. China*

<sup>‡</sup> *State key laboratory of optoelectronic materials and technologies, School of Material Science and Engineering, Sun Yat-sen (Zhongshan) University, Guangzhou 510275, People's Republic of China*

\* Correspondence and requests for materials should be addressed to N.L. e-mail: [lina150907@gdut.edu.cn](mailto:lina150907@gdut.edu.cn) and C.X.W. e-mail: [wchengx@mail.sysu.edu.cn](mailto:wchengx@mail.sysu.edu.cn)

## Calculation method

(1) Specific capacitances derived from galvanostatic charge/discharge tests are calculated

from:  $C_{specific} = \frac{I}{M\bar{v}}$

Where  $C_{specific}$  is specific capacitance for a device in F/g, F/cm<sup>2</sup> or F/cm<sup>3</sup>, I is the discharge current in A, and  $\bar{v}$  is the slope of the discharge curve after the IR drop.

(2) The electrochemical performance shown in the Ragone plot was measured under the same dynamic condition from the C-V datas. The specific energy density (E) and power density (P) of the device were obtained from the following formula:

$$E = \frac{1}{2} \times C_{specific} \times \frac{(\Delta V)^2}{3600} \quad P = \frac{E}{\Delta t} \times 3600$$

Where E is the energy density in Wh Kg<sup>-1</sup> or Wh cm<sup>-3</sup>),  $C_{specific}$  is the mass or volumetric stack capacitance obtained above and  $\Delta V$  is the discharge voltage range (in V). P is the energy density in WKg<sup>-1</sup> or W cm<sup>-3</sup>,  $\Delta t$  is the discharge time (in S).

(3) Equivalent series resistance (ESR ( $\Omega$ )) is the internal resistance of the device) was obtained by the following equation:  $ESR = \frac{iR_{drop}}{2I}$

**Figure S1:** High-resolution SEM images observed from the side-view illustrate the stair-step micro-structures.

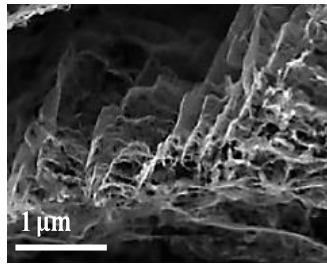

**Figure S2:** SEM micrographs of GNHC-GF obtained from the side-view demonstrate the porous network microstructure of the face of the cubes.

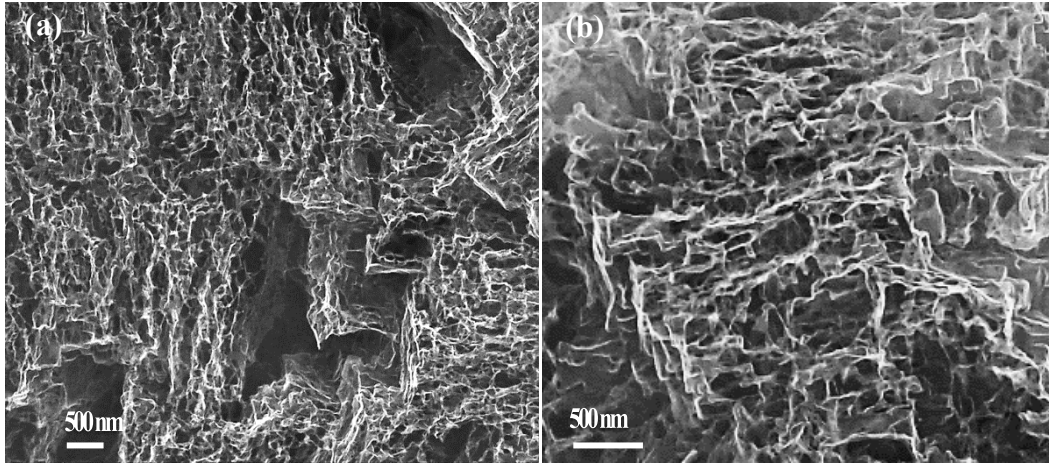

**Figure S3:** The sectional view of GNHC-GF shows that the film thickness.

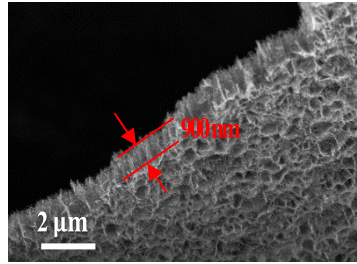

**Figure S4:** Ragone plot of the device calculated based on GNHC-GF/electrolyte and the total device. The volumetric energies as a function of power density are compared with previously reported flexible transparent supercapacitors.

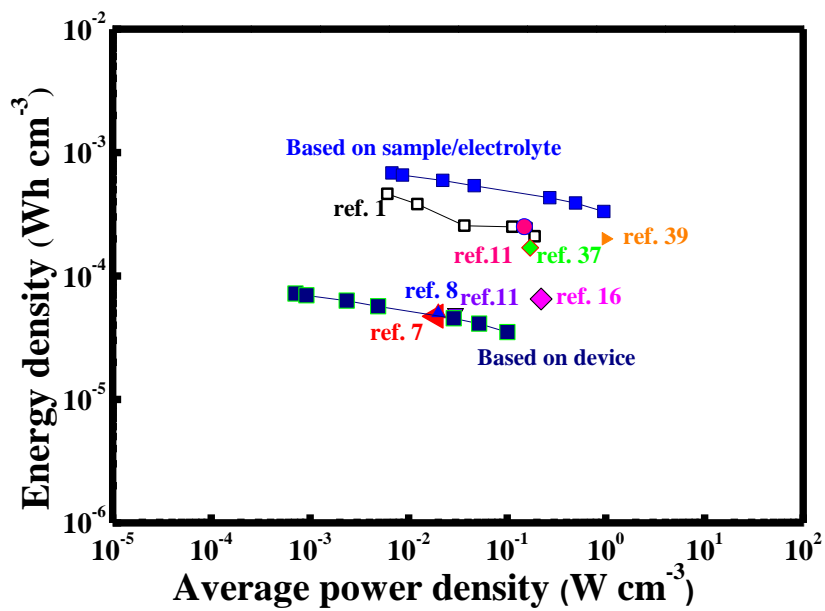

**Table S1: Comparison results among transparent/nontransparent supercapacitors.**

| Material                                          | Transmittance, flexibility                        | Specific capacitance                             | Energy density                                                          | Power density                                            | Ref.        |
|---------------------------------------------------|---------------------------------------------------|--------------------------------------------------|-------------------------------------------------------------------------|----------------------------------------------------------|-------------|
| MWCNT film                                        | <i>Transparent/flexible (62%)</i>                 | 146 $\mu$ F/cm <sup>2</sup> (based on electrode) | 12.5Wh/Kg (based on electrode)                                          | 13.9KW/Kg (based on electrode materials)                 | 1           |
| PANI&MWCNT                                        | Transparent/flexible (60%)                        | 300F/g (based on electrode)                      | —                                                                       | —                                                        | 2           |
| MWCNT film                                        | <i>Transparent/flexible (75%)</i>                 | 7.3F/g (for device)                              | 2.4Wh/Kg (based on electrode)                                           | 0.9Kw/Kg (based on electrode)                            | 3           |
| PANI&SWCNT                                        | <i>Transparent/flexible (55%)</i>                 | 55F/g (for device)                               | —                                                                       | —                                                        | 4           |
| nano-energed carbon films                         | <i>Transparent/flexible (71%)</i>                 | 409 $\mu$ F/cm <sup>2</sup> (for device)         | 47 $\mu$ Wh/cm <sup>3</sup> (for electrolyte/material)                  | 19mW/cm <sup>3</sup> (based on electrolyte /)            | 5           |
| graphene film                                     | <i>Transparent/flexible (67%)</i>                 | 12.4 $\mu$ F/cm <sup>2</sup> (for device)        | 2.94Wh/Kg (based on electrode)                                          | 438.6KW/Kg (based on electrode)                          | 6           |
| CVD graphene                                      | <i>Transparent/stretchable (50-60%)</i>           | 5.8 $\mu$ F/cm <sup>2</sup> (7.6F/g)             | —                                                                       | —                                                        | 7           |
| CVD graphene                                      | <i>Transparent/flexible</i>                       | 80.7 $\mu$ F/cm <sup>2</sup> (for device)        | 2.5 mWh/cm <sup>3</sup> (for device)                                    | 495W/cm <sup>3</sup> (for device)                        | 8           |
| CVD graphene                                      | <i>Transparent/flexible</i>                       | 80 $\mu$ F/cm <sup>2</sup> (for device)          | —                                                                       | —                                                        | 9           |
| RGO film                                          | <i>Transparent/flexible</i>                       | 394 $\mu$ F/cm <sup>2</sup> (for device)s        | —                                                                       | —                                                        | 9           |
| CVD graphene                                      | <i>Transparent/stretchable</i>                    | 4.27 $\mu$ F/cm <sup>2</sup> (for device)        | 0.20 nWh/ cm <sup>2</sup>                                               | 36.48 $\mu$ W/cm <sup>2</sup>                            | 10          |
| FFT-GP                                            | <i>Transparent/flexible (electrode79%)</i>        | 3.3mF/cm <sup>2</sup> (for device)               | 430 $\mu$ Wh/cm <sup>3</sup> (for electrolyte/material)                 | 190mW/cm <sup>3</sup> (for electrolyte/materials)        | 11          |
| <b>RNHC-GF</b>                                    | <b><i>Transparent/flexible (electrode68%)</i></b> | <b>5.48 mF/cm<sup>2</sup> (for device)</b>       | <b>657.2<math>\mu</math>Wh/cm<sup>3</sup>(for electrolyte/material)</b> | <b>954.3mW/cm<sup>3</sup>(for electrolyte/materials)</b> | <b>Here</b> |
| SFT-GF                                            | <i>Transparent/flexible (device 51.6%)</i>        | 4.21 mF/cm <sup>2</sup> (for device)             | 552.3 $\mu$ Wh/cm <sup>3</sup>                                          | 561.9 mW/cm <sup>3</sup>                                 | 12          |
| onion-likecarbon                                  | <i>Nontransparent/flexible</i>                    | 1.7mF/cm <sup>2</sup> (for device)               | 10 mWh/cm <sup>3</sup> (for device)                                     | 1Kw/cm <sup>3</sup> (for device)                         | 13          |
| Fe <sub>2</sub> O <sub>3</sub> //MnO <sub>2</sub> | <i>Nontransparent/flexible</i>                    | 1.5F/cm <sup>3</sup>                             | 0.55 mWh/cm <sup>3</sup> (for device)                                   | 150 mW/cm <sup>3</sup> (for device)                      | 14          |
| NPG-PPy//NPG-PPy                                  | <i>Nontransparent/flexible</i>                    | 30 F/cm <sup>3</sup>                             | 2.8 mWh/cm <sup>3</sup> (for device)                                    | 56.7 W/cm <sup>3</sup> (for device)                      | 15          |
| MnO <sub>2</sub> //carbon fiber                   | <i>Nontransparent/flexible</i>                    | 10 F/cm <sup>3</sup>                             | 5 mWh/cm <sup>3</sup> (for device)                                      | 929 mW/cm <sup>3</sup>                                   | 16          |
| WO <sub>3</sub> @MoO <sub>3</sub> /PANI           | <i>Nontransparent/flexible</i>                    | 216mF/cm <sup>2</sup>                            | 1.9 mWh/cm <sup>3</sup> (for device)                                    | 730 mW/cm <sup>3</sup>                                   | 17          |

## Reference:

- (1) Niu, Z. Q.; Zhou, W. Y.; Chen, J.; Feng, G. X.; Li, H.; Hu, Y. S.; Ma, W. J.; Dong, H. B.; Li, J. Z.; Xie, S. S. A Repeated Halving Approach to Fabricate Ultrathin Single-Walled Carbon Nanotube Films for Transparent Supercapacitors. *Small* 2013, 9, 518-524.
- (2) Lin, H. J.; Li, L.; Ren, J.; Cai, Z. B.; Qiu, L. B.; Yang, Z. B.; Peng, H. S. Conducting Polymer Composite Film Incorporated with Aligned Carbon Nanotubes for Transparent, Flexible and Efficient Supercapacitor. *Sci Rep-Uk* 2013, 3.
- (3) Chen, T.; Peng, H. S.; Durstock, M.; Dai, L. M. High-Performance Transparent and Stretchable All-Solid Supercapacitors Based on Highly Aligned Carbon Nanotube Sheets. *Sci Rep-Uk* 2014, 4.
- (4) Choi, B. G.; Chang, S. J.; Kang, H. W.; Park, C. P.; Kim, H. J.; Hong, W. H.; Lee, S.; Huh, Y. S. High Performance of a Solid-State Flexible Asymmetric Supercapacitor Based on Graphene Films. *Nanoscale* 2012, 4, 4983-4988.
- (5) Jung, H. Y.; Karimi, M. B.; Hahm, M. G.; Ajayan, P. M.; Jung, Y. J. Transparent, Flexible Supercapacitors From Nano-Engineered Carbon Films. *Sci Rep-Uk* 2012, 2.
- (6) Gao, Y.; Zhou, Y. S.; Xiong, W.; Jiang, L. J.; Mahjouri-samani, M.; Thirugnanam, P.; Huang, X.; Wang, M. M.; Jiang, L.; Lu, Y. F. Transparent, Flexible, and Solid-State Supercapacitors Based on Graphene Electrodes. *Apl. Mater.* 2013, 1.
- (7) Chen, T.; Xue, Y. H.; Roy, A. K.; Dai, L. M. Transparent and Stretchable High-Performance Supercapacitors Based on Wrinkled Graphene Electrodes. *Acs Nano* 2014, 8, 1039-1046.
- (8) Wu, Z. S.; Parvez, K.; Feng, X. L.; Mullen, K. Graphene-Based In-Plane Micro-Supercapacitors with High Power and Energy Densities. *Nat. Commun.* 2013, 4.
- (9) Yoo, J. J.; Balakrishnan, K.; Huang, J. S.; Meunier, V.; Sumpter, B. G.; Srivastava, A.; Conway, M.; Reddy, A. L. M.; Yu, J.; Vajtai, R.; Ajayan, P. M. Ultrathin Planar Graphene Supercapacitors. *Nano Lett.* 2011, 11, 1423-1427.
- (10) Xu, P.; Kang, J.; Choi, J. B.; Suhr, J.; Yu, J. Y.; Li, F. X.; Byun, J. H.; Kim, B. S.; Chou, T. W. Laminated Ultrathin Chemical Vapor Deposition Graphene Films Based



Stretchable and Transparent High-Rate Supercapacitor. *ACS Nano* 2014, 8, 9437-9445.

(11) Li, N.; Yang, G. Z.; Sun, Y.; Song, H. W.; Cui, H.; Yang, G. W.; Wang, C. X. Free-Standing and Transparent Graphene Membrane of Polyhedron Box-Shaped Basic Building Units Directly Grown Using a NaCl Template for Flexible Transparent and Stretchable Solid-State Supercapacitors. *Nano Lett.* 2015, 15, 3195-3203.

(12) Na Li, Xuankai Huang, Haiyan Zhang, Yunyong Li, and Chengxin Wang, Transparent and Self-Supporting Graphene Films with Wrinkled-Graphene-Wall-Assembled Opening Polyhedron Building Blocks for High Performance Flexible/Transparent Supercapacitors. *ACS Appl. Mater. Inter.*

(13) Pech, D.; Brunet, M.; Durou, H.; Huang, P. H.; Mochalin, V.; Gogotsi, Y.; Taberna, P. L.; Simon, P. Ultrahigh-Power Micrometre-Sized Supercapacitors Based on Onion-Like Carbon. *Nat. Nanotechnol.* 2010, 5, 651-654.

(14) Yang, P. H.; Ding, Y.; Lin, Z. Y.; Chen, Z. W.; Li, Y. Z.; Qiang, P. F.; Ebrahimi, M.; Mai, W. J.; Wong, C. P.; Wang, Z. L. Low-Cost High-Performance Solid-State Asymmetric Supercapacitors Based on MnO<sub>2</sub> Nanowires and Fe<sub>2</sub>O<sub>3</sub> Nanotubes. *Nano Lett.* 2014, 14, 731-736.

(15) Meng, F. H.; Ding, Y. Sub-Micrometer-Thick All-Solid-State Supercapacitors with High Power and Energy Densities. *Adv. Mater.* 2011, 23, 4098-4015.

(16) Yu, D. S.; Goh, K. L.; Zhang, Q.; Wei, L.; Wang, H.; Jiang, W. C.; Chen, Y. Controlled Functionalization of Carbonaceous Fibers for Asymmetric Solid-State Micro-Supercapacitors with High Volumetric Energy Density. *Adv. Mater.* 2014, 26, 6790-6797.

(17) Xiao, X.; Ding, T. P.; Yuan, L. Y.; Shen, Y. Q.; Zhong, Q.; Zhang, X. H.; Cao, Y. Z.; Hu, B.; Zhai, T.; Gong, L.; Chen, J.; Tong, Y. X.; Zhou, J.; Wang, Z. L. WO<sub>3-x</sub>/MoO<sub>3-x</sub> Core/Shell Nanowires on Carbon Fabric as an Anode for All-Solid-State Asymmetric Supercapacitors. *Adv. Energy Mater.* 2012, 2, 1328-1332.
